# Supplementary material
Source: Springer Nature journal article supplement (https://www.springermedizin.de/resource/supplementary/12876_2014_1189_MOESM3_ESM.pdf/9438302)

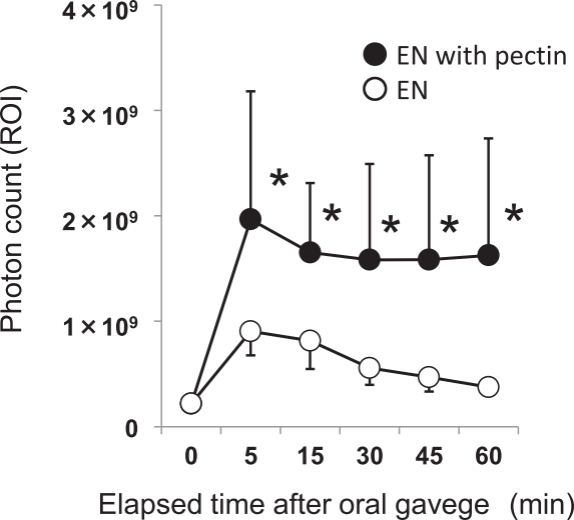

Supplement: MOESM3 [file 9438302]
